# Supplementary material
Source: Springer Nature journal article supplement (https://www.springermedizin.de/resource/supplementary/12997_2005_6_MOESM1_ESM.pdf/9623108)

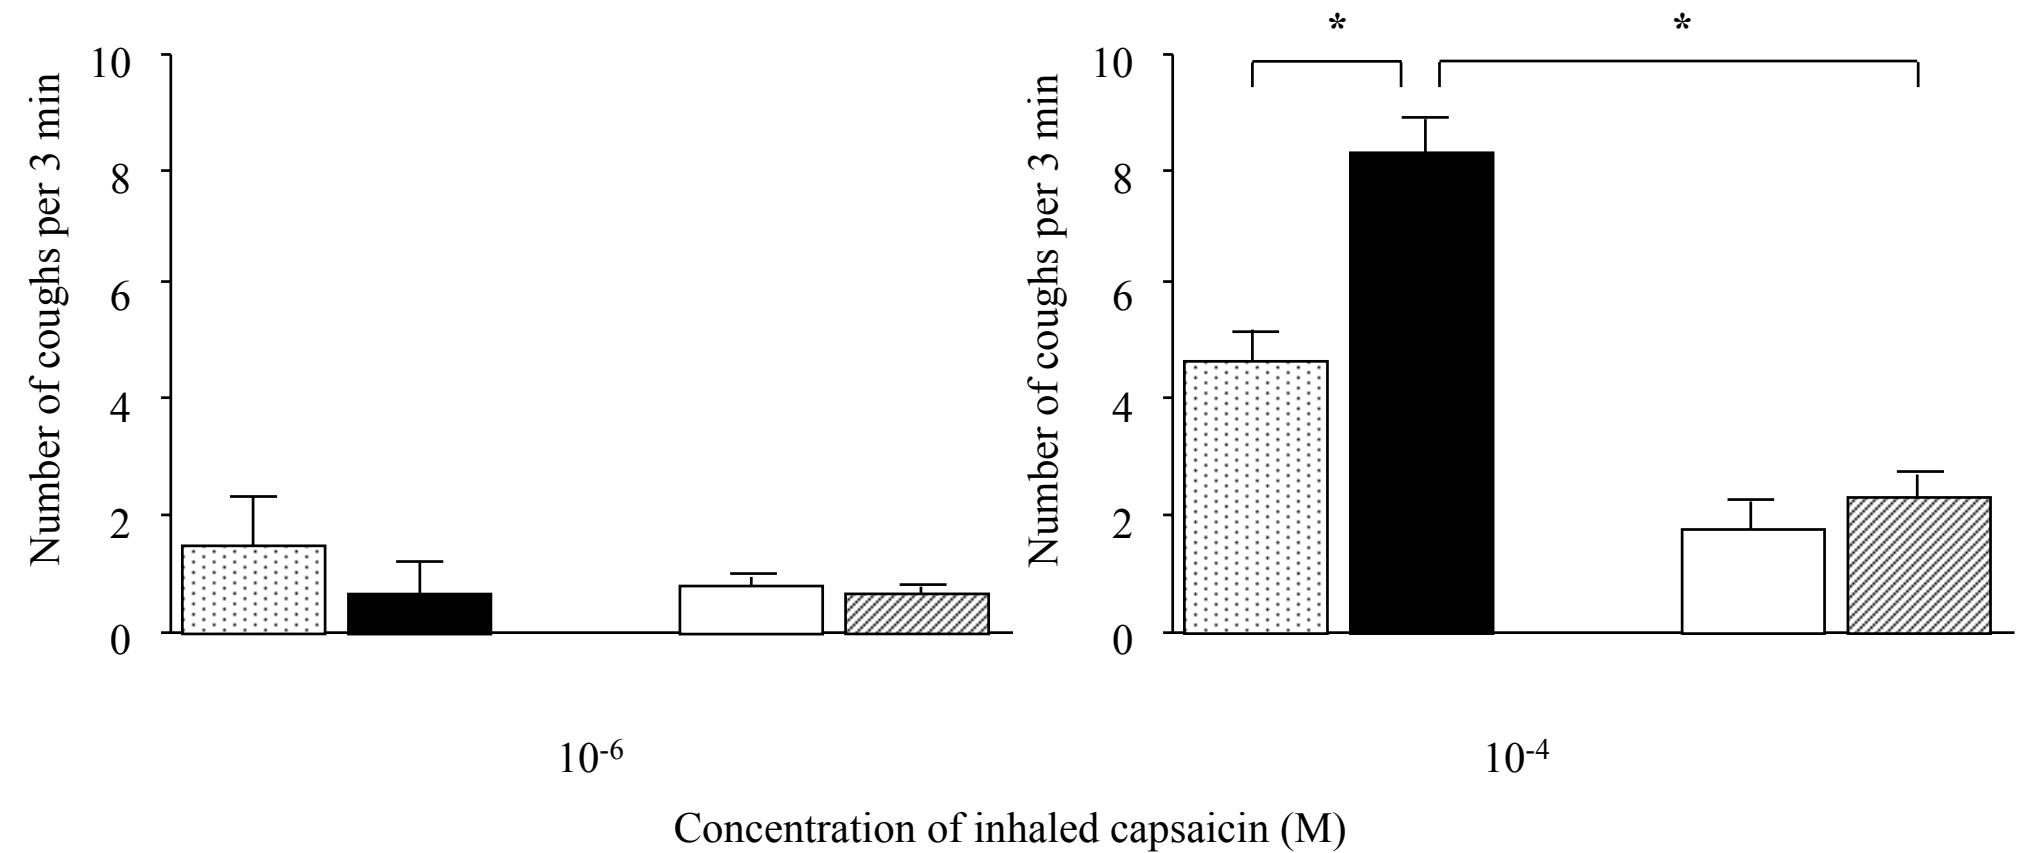

10<sup>-6</sup>

10<sup>-4</sup>

Concentration of inhaled capsaicin (M)

Supplement: MOESM1 [file 9623108]
